# Supplementary material for: Understanding paratyphoid infection: study protocol for the development of a human model of Salmonella enterica serovar Paratyphi A challenge in healthy adult volunteers
Source: HighWire-hosted journal article supplement (doi:10.1136/bmjopen-2014-007481), 2015-06-01
Supplement: bmjopen-2014-007481supp2.pdf [file bmjopen-2014-007481supp2.pdf]

## Supplementary 2. Summary of study procedures

|                                             |           | Intensive challenge period (14 days) |      |                              |    |                                 |     | Diagnosed with paratyphoid |      |                      | Follow-up visits |                  |
|---------------------------------------------|-----------|--------------------------------------|------|------------------------------|----|---------------------------------|-----|----------------------------|------|----------------------|------------------|------------------|
|                                             | screening | D0                                   | +12H | D1, D2,<br>D3, D4,<br>D5, D6 | D7 | D8, D9,<br>D10, D11,<br>D12,D13 | D14 | PD                         | +12H | +24,+48,<br>+72,+96H | D28              | D90, 180,<br>365 |
| Informed consent                            | x         |                                      |      |                              |    |                                 |     |                            |      |                      |                  |                  |
| Revalidation of consent                     |           | x                                    |      |                              |    |                                 |     |                            |      |                      |                  |                  |
| Obtain 24 hr contact details                |           | x                                    |      |                              |    |                                 |     |                            |      |                      |                  |                  |
| Medical history                             | x         |                                      |      |                              |    |                                 |     |                            |      |                      |                  |                  |
| Interim medical history                     |           | x                                    | x    | x                            | x  | x                               | x   | x                          | x    | x                    | x                | x                |
| Physical examination                        | x         | x                                    |      |                              |    |                                 |     | x                          |      |                      |                  |                  |
| Vital signs                                 | x         | x                                    | x    | x                            | x  | x                               | x   | x                          | x    | x                    | x                |                  |
| Urine pregnancy test                        | x         | x                                    |      |                              |    |                                 | x   | x                          |      |                      |                  |                  |
| Urine sample                                | x         | x                                    |      | x                            | x  | x                               | x   | x                          |      | x                    |                  | x                |
| Saliva sample                               |           | x                                    |      | x                            | x  | x                               | x   | x                          |      | x                    |                  | x                |
| Stool sample                                |           | x                                    |      | x                            | x  | x                               | x   | x                          |      | x                    |                  | x                |
| Blood sample                                | x         | x                                    | x    | x                            | x  | x                               | x   | x                          | x    | x                    | x                | x                |
| 12 lead ECG                                 | x         |                                      |      |                              |    |                                 |     |                            |      |                      |                  |                  |
| Ultrasound scan                             | x         |                                      |      |                              |    |                                 |     |                            |      |                      |                  |                  |
| Mood assessment                             | x         | x                                    |      |                              | x  |                                 | x   | x                          |      |                      |                  |                  |
| Challenge with S. Paratyphi                 |           | x                                    |      |                              |    |                                 |     |                            |      |                      |                  |                  |
| Issue study pack                            | x         | x                                    |      |                              |    |                                 |     |                            |      |                      |                  |                  |
| eDiary entries*                             |           |                                      |      | x                            | x  | x                               | x   | x                          | x    | x                    | x                |                  |
| Commence antibiotics                        |           |                                      |      |                              |    |                                 | x   | x                          |      |                      |                  |                  |
| Notification of public health and GP**      |           | x                                    |      |                              |    |                                 |     |                            |      |                      |                  |                  |
| Letter informing close contacts             | x         |                                      |      |                              |    |                                 | x   |                            |      |                      |                  |                  |
| Letter to close contacts offering screening |           |                                      |      |                              |    |                                 |     |                            |      |                      | x                |                  |

\*eDiary will be open from day 0-21 for temperature and symptom recordings.

\*\*The local Public Health England Unit and the participant's GP will be contacted on challenge and on completion of stool clearance samples. GPs will receive an additional letter when a participant has started antibiotic treatment.
